# Supplementary material
Source: publisher figshare collection journal article supplement (https://gsapubs.figshare.com/ndownloader/files/23304017)
Supplement: Supplementary file 1 [file 23304017]

## Sheet: Sheet1
Strat.Pos.	No.	Quartz	K-feldspar	Plagioclase	Calcite	Dolomite	kaolinite	2:1 Al-clay	Fe-Chlorite	Barite	Anatase	Pyrite	Goethite	Total Clays
0.5	EDC-2	26	3	1	0	0	6	62	1	0	0.5	0.5	0	69
1.75	EDC-7	56	5	3	6	2	2	25	1	0	0	0.1	0	28
2	EDC-8	40	8	4	4	5	4	34	0.7	0	0	0	0	38.7
3.75	EDC-15	26	4	2	0.8	2	6	54	2	0	0.7	0	2	62
4.75	EDC-19	39	6	3	0.9	0.2	6	43	0.1	0	0.7	0	2	49.1
5.5	EDC-22	70	5	3	5	3	2	11	0.4	0	0	0.1	0.2	13.4
6.25	EDC-25	48	6	2	1	4	5	33	0.6	0	0.4	0.1	0	38.6
7.25	EDC-29	35	3	0.6	4	6	4	45	0.5	0	0.1	0.1	1	49.5
8.25	EDC-33	33	8	0.6	0.2	2	6	47	1	0	0.2	0.4	2	54
9	EDC-36	34	3	1	0.3	0.5	8	51	0.8	0	0.2	0.1	0.6	59.8
9.75	EDC-39	44	3	1	0.1	0	5	44	3	0	0.3	0	0.6	52
10.5	EDC-42	38	4	2	0	0	5	49	0.3	0	0.7	0.1	0.6	54.3
11.25	EDC-45	50	4	3	0.8	2	4	34	2	0	0.1	0	0	40
12	EDC-48	30	4	0.6	3	3	6	52	1	0	0.3	0.5	0.7	59
12.75	EDC-51	54	6	4	9	3	1	22	0.2	0	0.3	0.2	0	23.2
13.5	EDC-54	48	6	6	3	4	5	28	0	0	0	0.2	0	33
14.25	EDC-57	52	6	3	2	4	3	29	0.2	0	0.2	0.4	0.7	32.2
15	EDC-60	30	3	1	0	0	6	57	2	0	0.4	0	0	65
15.75	EDC-63	26	2	0.8	0.1	0	6	61	2	0	0.3	0.4	2	69
16.5	EDC-66	24	3	1	0.3	0.2	5	65	1	0	0.1	0.1	0.1	71
17.25	EDC-69	26	4	1	0.3	0.3	7	58	2	0	0.3	0.1	1	67
18.25	EDC-73	62	5	3	0.4	3	0.3	20	2	3	0.6	0.1	0	22.3
19	EDC-76	25	2	0.8	0.3	0.5	8	60	2	0	0.3	0.5	0.6	70
19.5	EDC-78	30	4	2	1	1	4	50	5	0	0.5	0.9	0.7	59
20.25	EDC-81	29	2	0.2	0	0	5	61	1	0	0.3	0.2	0.8	67
21.5	EDC-86	37	4	2	0.2	0.3	7	46	2	0	0.6	0.5	1	55
22.5	EDC-90	47	7	2	0.4	2	7	33	1	0	0	0.1	0.5	41
24	EDC-96	42	4	2	4	3	3	41	1	0	0.8	0	0.2	45
25	EDC-100	28	2	0.5	0.1	0.4	5	63	0.2	0	0.3	0.1	0.5	68.2
26	EDC-104	53	5	4	6	5	5	21	0.9	0	0.1	0	0.1	26.9
26.75	EDC-107	61	5	3	6	3	2	19.5	0.5	0	0	0	0	22
27.75	EDC-111	27	2	0	0.8	1	5	62	0.8	0	0.7	0.2	0.6	67.8
28.75	EDC-115	33	2	0.9	0.3	2	6	51	2	0	0.6	0	2	59
29.75	EDC-119	30	3	1	0.6	3	5	54	2	0	0.5	0	1	61
30.5	EDC-122	64	5	5	4	3	2	16	0.3	0	0.3	0.2	0	18.3
32.75	EDC-131	23	2	0	0.3	0.1	5	67	3	0	0.3	0.1	0.8	75
33.75	EDC-135	42	4	0.7	0	0	7	44	1	0	0.1	0	0.7	52
34.75	EDC-139	23	0.5	0.2	0	0	6	68	2	0	0.6	0	0	76
35.75	EDC-143	32	3	0.7	3	3	7	46	1	0	0.2	0.6	2	54
36.75	EDC-147	52	9	3	5	5	4	22	0.4	0	0	0.1	0.8	26.4
37.75	EDC-151	29	3	0	0	0	5	60	0.5	0	0.4	0	1	65.5
38.75	EDC-155	41	3	1	0.4	2	5	43	2	0	0.3	0.4	0.6	50
39.75	EDC-159	33	3	0.6	0.3	0.3	5	56	0.5	0	0.5	0.3	0.5	61.5
40.75	EDC-163	38	5	0.8	0.2	0.3	6	49	0.5	0	0.5	0.3	0	55.5
41.75	EDC-167	36	3	0.3	0.1	0.1	7	49	3	0	0.1	0	2	59
44.25	EDC-177	25	2	0	0.2	0.9	7	63	0	0	0.4	0.4	0	70
45.25	EDC-181	28	4	0.3	2	1	3	55	6	0	0.9	0.2	0.7	64
46.75	EDC-187	22	1	0	0.2	0.2	4	69	2	0	0.3	0	0.2	75
47.25	EDC-189	25	3	0.5	0.5	0	6	58	2	0	0	0.1	4	66
47.75	EDC-191	27	2	0.1	0	0.6	6	60	2	0	0.4	0.2	2	68
48.75	EDC-195	33	4	0.4	0	0	6	55	0.5	0	0.4	0.1	1	61.5
49.5	EDC-198	52	5	2	2	3	4	31	2	0	0.4	0	0	37
50.5	EDC-202	59	5	2	9	2	2	19	1	0	0.2	0	0.4	22
51.25	EDC-205	55	7	2	8	4	4	17	4	0	0	0.4	0.2	25
51.5	EDC-206	59	7	3	4	3	2	20	1	0	0.5	0.1	0	23
52	EDC-208	40	4	2	3	5	6	38	1	0	0.2	0.1	0.6	45
52.75	EDC-211	23	3	0	2	2	7	61	2	0	0.1	0.1	1	70
53.5	EDC-214	28	3	0.5	1	1	7	55	2	0	0.2	0.3	0.9	64
54.25	EDC-217	28	3	1	1	3	7	52	2	0	0.1	0	2	61
55	EDC-220	23	2	0	0	0	5	66	1	0	0.6	0.1	3	72
55.75	EDC-223	24	2	0.5	0	0	6	64	1	0	0.5	0	1	71
56.5	EDC-226	27	2	0.5	0.2	0.4	4	63	0.9	0	0.2	0	2	67.9
58	EDC-232	27	2	0.6	0.2	0.1	9	59	0.5	0	0.4	0.1	0.9	68.5
59	EDC-236	30	2	1	0	0	6	58	1	0	0.3	0.4	1	65
60	EDC-240	22	1	0.4	0	0.6	6	66	2	0	0	0.1	2	74
61	EDC-244	21	2	0	3	2	7	62	2	0	0.2	0	2	71
62.25	EDC-249	28	2	0.5	0	0	3	65	0.2	0	0.5	0.2	0.8	68.2
62.75	EDC-251	29	2	0.2	0	0	4	62	1	0	0.5	0	1	67
63.75	EDC-255	30	1	0.2	0	0	5	61	0.1	0	0.7	0	2	66.1
65	EDC-260	68	4	2	6	3	2	14	0.5	0	0.1	0	0	16.5
66	EDC-264	52	5	3	4	4	2	29	1	0	0.1	0	0.1	32
66.5	EDC-266	65	5	2	7	2	0.8	17	0.8	0	0.1	0	0.1	18.6
67	EDC-268	50	3	1	3	4	3	35	1	0	0.1	0.1	0	39
68	EDC-272	31	4	0	1	2	6	52	2	0	0	0.1	2	60
68.75	EDC-275	24	1	0.2	0	0	6	64	4	0	0.2	0	1	74
69.75	EDC-279	35	2	0.2	0.7	0.2	6	51	0.4	0	0.6	0.1	3	57.4
70.25	EDC-281	37	2	1	1	2	6	47	3	0	0	0	1	56
71.5	EDC-286	28	3	0	3	0.9	6	54	4	0	0	0.1	0	64
72.25	EDC-289	30	3	0	1	1	7	52	3	0	0.1	0	2	62
73	EDC-292	34	4	0.6	1	3	7	48	1	0	0.6	0.3	0.1	56
73.75	EDC-295	23	1	0.4	0	0	4	67	2	0	0.7	0	1	73
74.5	EDC-298	26	1	0	0	0	6	63	2	0	0.3	0.1	1	71
75.25	EDC-301	24	1	0.2	0.2	0	6	67	0.1	0	0.6	0.2	0.5	73.1
76	EDC-304	23	2	0.2	1	0.4	9	61	1	0	0.3	0.1	2	71
77	EDC-308	21	2	0	9	1	6	60	0.9	0	0	0	0.8	66.9
77.75	EDC-311	29	8	4	5	4	8	39	2	0	0	0	0.1	49
78.5	EDC-314	29	2	0.3	1	3	6	57	0.7	0	0.2	0.5	0.3	63.7
79.25	EDC-317	49	6	5	9	3	9	16	0.3	2	0.7	0.2	0.2	25.3
80	EDC-320	24	4	2	3	4	9	44	7	0	0.6	0.2	1	60
80.75	EDC-323	26	2	1	0.5	0	5	61	2	0	0.5	0.3	1	68
81.5	EDC-326	28	2	0.6	1	0	7	55	5	0	0.4	0	1	67
82.25	EDC-329	25	2	0.6	0.1	0.4	10	59	1	0	0.3	0	2	70
84	EDC-336	49	7	3	7	3	3	24	2	0	0	0.1	1	29
84.75	EDC-339	45	8	4	3	4	2	33	2	0	0.4	0.1	0	37
85.25	EDC-341	61	4	2	6	3	4	19.5	0.5	0	0	0	0	24
86.25	EDC-345	58.0933	3.97219	1.29096	6.25621	2.78054	3.77358	22.2443	1.58888	0	0	0	0	27.6068
86.75	EDC-347	60	5	2	6	3	3	20	0.9	0	0.3	0.2	0.1	23.9
87.25	EDC-349	51	5	2	0.8	2	2	34	3	0	0.3	0	0	39
88	EDC-352	57	6	3	5	3	2	20	4	0	0.3	0.1	0.3	26
89.25	EDC-357	60	5	2	6	3	4	18	1	0	0.4	0.1	0	23
90.25	EDC-361	22	2	0.6	0.2	0.2	5	67	2	0	0.3	0.3	0.1	74
91.5	EDC-366	66	4	0.3	1	2	3	23	0.2	0	0	0	0.4	26.2
93	EDC-372	61	5	0	0.4	0.6	4	27	2	0	0.2	0.2	0.7	33
93.5	EDC-374	27	3	0.5	10	3	5	48	0.9	0	0.3	0.2	1	53.9
94	EDC-376	46	6	3	4	2	3	35	0	0	0.2	0	1	38
94.75	EDC-379	32	2	1	4	3	6	46	4	0	0.3	0	1	56
95.5	EDC-382	27	1	0.4	0	0	5	64	0.8	0	0.4	0	0	69.8
96.5	EDC-386	23	2	0	0	0	5	64	3	0	0.5	0	1	72
97.5	EDC-390	26	2	0	0	0	7	58	3	0	0.4	0.2	3	68
98.5	EDC-394	30	3	0.8	3	2	7	51	1	0	0	0	1	59
99.5	EDC-398	24	2	0	0	0	6	68	0	0	0.2	0	0.6	74
100.25	EDC-401	25	2	0	3	2	5	60	0.4	0	0.4	0	2	65.4
101	EDC-404	36	4	0.3	0.8	2	5	49	0.9	0	0.3	0.2	1	54.9
101.75	EDC-407	33	2	0.4	0.5	3	6	53	2	0	0.2	0.1	0.3	61
102.75	EDC-411	33	4	1	2	0.8	6	50	3	0	0.3	0.2	0.1	59
103.75	EDC-415	36	5	0.4	0.1	1	7	46	4	0	0.2	0	0.6	57
104.75	EDC-419	21	2	0.2	0	0	4	70	1	0	0.9	0.2	0.2	75
105.75	EDC-423	27	3	0.3	0.5	0.5	9	57	1	0	0	0	2	67
106.75	EDC-427	41	6	2	0.1	4	8	37	0.3	0	0	0.4	0.7	45.3
107.5	EDC-430	23	2	0	0	0	7	65	0.5	0	0.5	0.1	2	72.5
108.5	EDC-434	26	2	0	8	0.7	6	56	0.8	0	0	0	0.1	62.8
109.5	EDC-438	31	3	0.7	2	1	5	52	2	0	0.2	0.3	3	59
110.25	EDC-441	28	2	0.5	0	0.1	7	57	2	0	0.7	0.4	2	66
111	EDC-444	44	4	2	0	0.5	3	45	0.8	0	0.4	0.2	1	48.8
111.25	EDC-445	58	6	3	3	2	3	19	6	0	0	0	0.1	28
112.25	EDC-449	25	3	0.5	1	2	3	59	5	0	0.3	0.3	0	67
113.25	EDC-453	36	3	0.9	0.5	0.4	7	48	2	0	0.3	0.3	0.4	57
114.25	EDC-457	27	5	0.4	0.7	2	6	55	3	0	0	0.2	0.5	64
115.25	EDC-461	26	2	0.6	0.3	0.7	5	61	2	0	0.6	0	2	68
115.75	EDC-463	58	8	4	5	3	2	17	4	0	0	0	0.4	23
117	EDC-468	30	3	0.7	0	0.7	7	55	3	0	0.2	0.1	0.3	65
118	EDC-472	42	2	1	0.2	0.3	7	45	2	0	0.4	0	0.9	54
119	EDC-476	38	3	3	4	2	5	41	2	0	0.7	0.1	1	48
120	EDC-480	43	5	3	2	2	5	36	0.3	0	0.8	0.2	2	41.3
121	EDC-484	41	4	2	0.6	2	4	44	2	0	0.4	0.1	0.7	50
122	EDC-488	48	4	4	4	3	3	30	3	0	0.6	0	0.8	36
123	EDC-492	22	2	0.9	0.2	0.5	6	64	2	0	0.4	0.2	1	72
124	EDC-496	48	5	2	0.4	3	5	35	2	0	0.2	0.1	0.5	42
125	EDC-500	24	2	0.4	0	0	6	65	2	0	0.2	0	0.5	73
125.75	EDC-503	16	0.9	0	46	0.4	2	34	0.1	0	0.3	0	0.7	36.1
126.75	EDC-507	26	4	0.3	0.5	0	5	59	3	0	0.3	0	2	67
127.75	EDC-511	30	2	0.5	0.1	0.4	7	56	1	0	0	0.1	1	64
128.75	EDC-515	28	3	0.9	0.1	0.2	8	56	2	0	0.4	0.2	2	66
129.5	EDC-518	36	3	1	0.7	2	6	43	8	0	0	0	0.4	57
130.5	EDC-522	57	5	0.5	0.2	0.7	3	32	1	0	0.8	0.4	0	36
131.5	EDC-526	42	5	3	4	6	3	32	6	0	0	0.1	0	41
	Average	36.4527	3.56419	1.27117	2.1997	1.5848	5.14982	46.7209	1.71431	0.0342466	0.30411	0.131507	0.836986	53.585
	Standard Deviation	12.9658	1.78332	1.28154	4.40257	1.52325	1.90092	15.8168	1.4582	0.297446	0.233379	0.157897	0.809002	17.0513
